# Supplementary material for: Fusobacterium nucleatum CbpF Mediates Inhibition of T Cell Function Through CEACAM1 Activation
Source: PubMed Central journal article supplement (PMC8319768; doi:10.3389/fcimb.2021.692544), 2021-07-15
Supplement: DataSheet_1.pdf [file DataSheet_1.pdf]

## Supplementary Material

### 1 Supplementary Figures and Tables

#### 721.221 cells alone

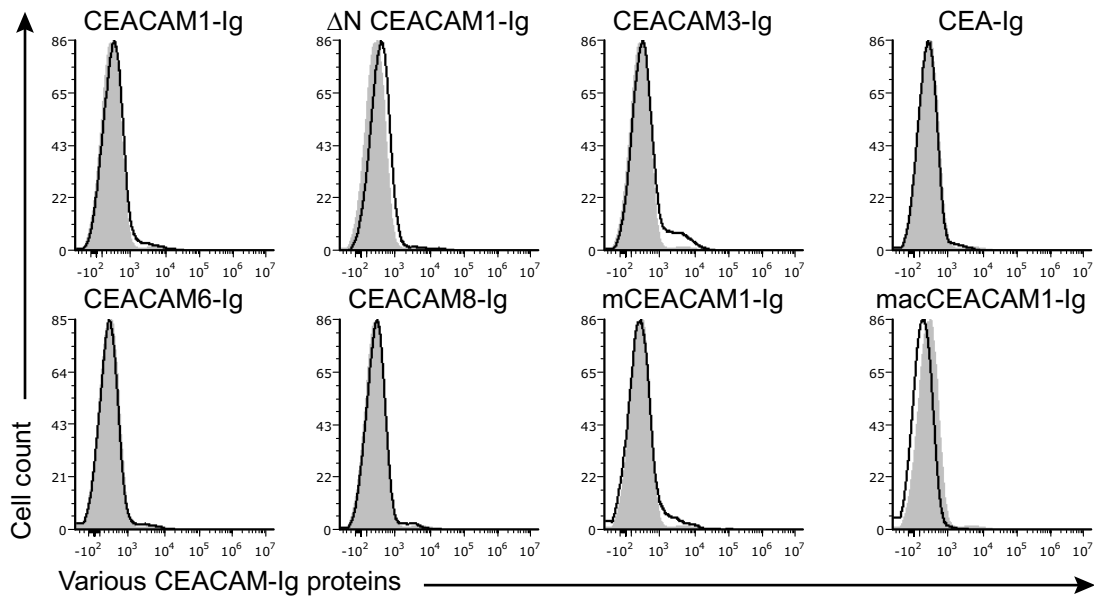

**Supplemental Figure 1. Staining of 721.221 cells alone with CEACAM fusion proteins.** (A) 721.221 cells alone were stained with 2  $\mu\text{g}$  of human CEACAM1-Ig,  $\Delta\text{N}$  CEACAM1-Ig that lacks the N-terminal domain, CEACAM3-Ig, CEA-Ig, CEACAM6-Ig, CEACAM8-Ig, mouse CEACAM1-Ig or macaque CEACAM1-Ig. Filled grey histograms represent staining with secondary antibody only. Representative histograms from three independent repeats are shown.

**Supplemental Table 1. Features of CEACAM-Ig proteins used in this study**

| <b>CEACAM protein</b> | <b>Species</b> | <b>Number of extracellular domains</b> | <b>Binding to <i>Fnn</i></b> |
|-----------------------|----------------|----------------------------------------|------------------------------|
| CEACAM1-Ig            | human          | 1 IgV-like domain, 3 IgC-like domains  | yes                          |
| $\Delta$ N CEACAM1-Ig | human          | 3 IgC-like domains                     | no                           |
| CEACAM3-Ig            | human          | 1 IgV-like domain                      | no                           |
| CEA-Ig                | human          | 1 IgV-like domain, 6 IgC-like domains  | yes                          |
| CEACAM6-Ig            | human          | 1 IgV-like domain, 2 IgC-like domains  | no                           |
| CEACAM8-Ig            | human          | 1 IgV-like domain, 2 IgC-like domains  | no                           |
| mCEACAM1-Ig           | mouse          | 1 IgV-like domain, 3 IgC-like domains  | no                           |
| macCEACAM1-Ig         | macaque        | 1 IgV-like domain, 3 IgC-like domains  | no                           |

*Fnn*: *Fusobacterium nucleatum* 23726  $\Delta$ galKT.
